# Supplementary material for: Daratumumab monotherapy for refractory lupus nephritis
Source: PubMed Central journal article supplement (PMC10427415; doi:10.1038/s41591-023-02479-1), 2023-08-10
Supplement: 41591_2023_2479_MOESM1_ESM.pdf [file 41591_2023_2479_MOESM1_ESM.pdf]

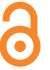

---

# Daratumumab monotherapy for refractory lupus nephritis

---

In the format provided by the authors and unedited

Table 1S: Clinical and laboratory parameters before daratumumab. Discontinuation of previous agents occurs at least 6 months before starting daratumumab for B-cell depleting agents, including cyclophosphamide. CYC: cyclophosphamide, AZA: azathioprine, RTX: rituximab, Bel: belimumab, Ocr: ocrelizumab.

|      | Last regimen before daratumumab | sCr (mg/dl) | Proteinuria g/24 h | SLEDAI-2K |
|------|---------------------------------|-------------|--------------------|-----------|
| Pt 1 | CYC+AZA                         | 2.1         | 9                  | 14        |
| Pt 2 | RTX+CYC                         | 0.6         | 8.5                | 8         |
| Pt 3 | CYC                             | 1.1         | 6                  | 10        |
| Pt 4 | Bel                             | 0.6         | 2                  | 8         |
| Pt 5 | Bel                             | 7.0         | 3                  | 14        |
| Pt 6 | Ocr                             | 0.6         | 7                  | 10        |

Table 2S: Laboratory profiles of the 6 patients.

| Patients | Hb; g/dl<br>(time 0, 3, 6, 9 and 12 months)<br>[12.5-16] | WBC<br>(time 0, 3, 6, 9 and 12 months)<br>[10*3/microl] | sCr (mg/dl)<br>(time 0, 3, 6, 9 and 12 months)<br>[0.5-0.96] | C3 (mg/dl)<br>(time 0, 3, 6, 9 and 12 months)<br>[90-180] | C4 /mg/dl)<br>(time 0, 3, 6, 9 and 12 months)<br>[10-40] | anti-dsDNA<br>(UI/mL)<br>(time 0, 3, 6, 9 and 12 months)<br>[<15] | CD19/20+ B cell numbers<br>(time 0, 3, 6, 9 and 12 months)<br>[cell/microl] | Hematuria<br>(time 0, 3, 6, 9 and 12 months) | uPT g/24h<br>(time 0, at 3, 6, 9 and 12 months)<br>[<0.3] | CrCl (ml/min)<br>(time 0, at 3, 6, 9 and 12 months)<br>[85-125] |
|----------|----------------------------------------------------------|---------------------------------------------------------|--------------------------------------------------------------|-----------------------------------------------------------|----------------------------------------------------------|-------------------------------------------------------------------|-----------------------------------------------------------------------------|----------------------------------------------|-----------------------------------------------------------|-----------------------------------------------------------------|
| Pt 1     | 14.9/13.3/15.0/15.2                                      | 7230/7760/6790/6760                                     | 2.1/1.3/1.3/1.5                                              | 58/112/89/80                                              | 12/25/18/19                                              | 378/124/12/12                                                     | 41/28/15/28                                                                 | ++/+-/+/+                                    | 9.8/1.5/1.2/2.0                                           | 52/90/90/81                                                     |
| Pt 2     | 12.1/11.1/12.1/10.9                                      | 6470/5510/7210/5400                                     | 0.6/0.6/0.6/0.6                                              | 93/146/60/82                                              | 14/16/6/13                                               | 127/43/12/12                                                      | 565/375/610/244                                                             | ++/+/-/-                                     | 8.0/0.1/2.6/1.5                                           | 162/162/162/162                                                 |
| Pt 3     | 11.1/12.1/10.9/10.5                                      | 5510/7210/5290/5460                                     | 1.2/1.6/1.3/1.3                                              | 20/74/81/96                                               | 5/22/22/22                                               | 157/65/77/12                                                      | 60/44/42/35                                                                 | ++/+-/+/+                                    | 5.5/0.3/0.3/0.1                                           | 42/31/38/38                                                     |
| Pt 4     | 13.1/12.9/12.3/12.3                                      | 9160/9310/7160/8240                                     | 0.6/0.7/0.6/0.6                                              | 94/109/99/115                                             | 10/19/18/18                                              | 321/12/12/12                                                      | 76/62/58/91                                                                 | -/-/-/-                                      | 2/0.4/0.4/0.3                                             | 145/124/145/145                                                 |
| Pt 5     | 8.6/9.0/9.1/10.6                                         | 3850/4560/6140/7950                                     | 7.0/3.5/3.6/3.3/                                             | 99/132/139/135                                            | 6/26/28/30                                               | 12/12/12/154                                                      | 98/90/78/50                                                                 | ++/-/-/-                                     | 2.8/0.7/0.1/0.1                                           | 11/22/21/23                                                     |
| Pt 6     | 12.2/12.7/12.3/11.4                                      | 3560/10430/4510/4410                                    | 0.6/0.6/0.6/0.7                                              | 76/85/144/140                                             | 7/12/12/12                                               | 15/12/12/15                                                       | 109/118/154/134                                                             | +++/+/+/+/+                                  | 7.2/6/5.5/6.0                                             | 109/109/109/94                                                  |
